# Supplementary material
Source: Springer Nature journal article supplement (https://www.springermedizin.de/resource/supplementary/12957_2014_1800_MOESM1_ESM.pdf/9563586)

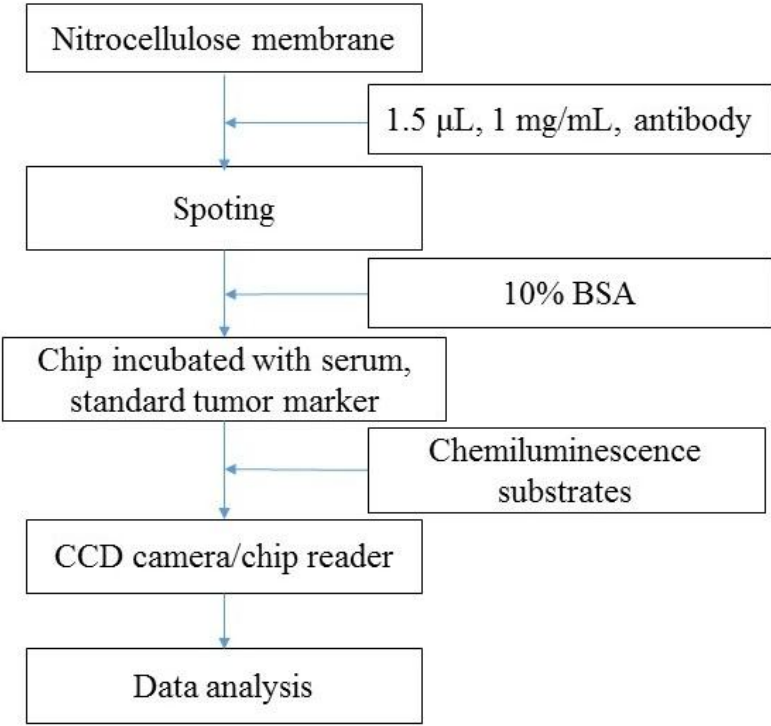

Supplement: MOESM1 [file 9563586]
